# Supplementary material for: Halogen-based reconstruction of Russian Arctic sea ice area from the Akademii Nauk ice core (Severnaya Zemlya)
Source: Copernicus journal article supplement (doi:10.5194/tc-10-245-2016), 2016-01-26
Supplement: Supplementary file 1 [file Supplementary informations_dataset.xlsx]

## Sheet: Read First
Akademii Nauk ice core (Severnaya Zemlya, Russian Arctic)
Halogens and sea ice data
est_yr_halogen		Chronology used for Iodine and bromine
Br, ng/g		Concentration of Bromine
I, ng/g		Concentration of Iodine
Na, ng/g		Concentration of Sodium
nssBr (ng\g)		Not sea salt Bromine (nssBr = [Br] – [Na] x 0.006)
Brenr		Bromine enrichement (Brenr = [Br] / [Na] x 0.006)
Artic Ocean (area in Km2)		536875
Laptev sea (area in Km2)		781875
Kara Sea (area in Km2)		496865

## Sheet: Arctic Ocean
yyyy-mm	Ice_Conc	Ice_Conc_STD	Sea ice area (km2)
1979-01	96.9	1.9	520232
1979-02	97.4	1.6	522916
1979-03	97.6	1.8	523990
1979-04	98.9	1.5	530969
1979-05	99.1	2.1	532043
1979-06	91.7	6	492314
1979-07	84	5	450975
1979-08	81.3	8.7	436479
1979-09	81.1	17.3	435406
1979-10	89.7	4.4	481577
1979-11	96.3	2	517011
1979-12	98.1	1.8	526674
1980-01	98	2	526138
1980-02	98.3	1.9	527748
1980-03	99	1.3	531506
1980-04	99	1.8	531506
1980-05	97.8	5.9	525064
1980-06	94.7	3.7	508421
1980-07	80.7	14.4	433258
1980-08	79.1	14.9	424668
1980-09	79.5	11.5	426816
1980-10	90.9	3.1	488019
1980-11	95.2	2.5	511105
1980-12	95.5	2.4	512716
1981-01	96.8	1.7	519695
1981-02	98	1.5	526138
1981-03	97.9	1.5	525601
1981-04	98.5	1.7	528822
1981-05	98	2.2	526138
1981-06	94.8	3.2	508958
1981-07	84.6	6.1	454196
1981-08	79.8	10.8	428426
1981-09	85.7	5.9	460102
1981-10	90.6	4.8	486409
1981-11	94.6	3.6	507884
1981-12	96.5	2.7	518084
1982-01	96.9	2.4	520232
1982-02	98.1	1.8	526674
1982-03	98.5	1.7	528822
1982-04	98.8	1.7	530432
1982-05	99.2	1.7	532580
1982-06	98.9	2.4	530969
1982-07	91	2.8	488556
1982-08	84.5	8.3	453659
1982-09	72.8	10.2	390845
1982-10	85	4.5	456344
1982-11	95.2	4.2	511105
1982-12	96.1	2.6	515937
1983-01	96.7	2.2	519158
1983-02	95.9	2.3	514863
1983-03	96.8	2.5	519695
1983-04	96.9	2.3	520232
1983-05	96.9	4.2	520232
1983-06	92.6	2.5	497146
1983-07	83.3	6.7	447217
1983-08	73.5	12.1	394603
1983-09	75.5	14.6	405341
1983-10	91.5	4.3	491241
1983-11	96.4	2.8	517548
1983-12	97.1	2	521306
1984-01	98.6	1.5	529359
1984-02	97.1	2.1	521306
1984-03	97.6	1.7	523990
1984-04	98.3	2.1	527748
1984-05	99.1	2	532043
1984-06	96.2	2.8	516474
1984-07	85	3.9	456344
1984-08	85.4	8.2	458491
1984-09	75.3	14.6	404267
1984-10	84.5	6.6	453659
1984-11	93.7	3.4	503052
1984-12	96.2	2.5	516474
1985-01	96.3	2.6	517011
1985-02	98.2	1.8	527211
1985-03	97.2	1.9	521842
1985-04	98.1	2.2	526674
1985-05	98.8	2.5	530432
1985-06	92.9	6.3	498757
1985-07	75.6	12.3	405877
1985-08	79.7	16	427889
1985-09	67.2	25.6	360780
1985-10	86.3	8.5	463323
1985-11	96.1	2.7	515937
1985-12	96.9	3.2	520232
1986-01	97.9	1.9	525601
1986-02	96.4	2.6	517548
1986-03	95.9	2.4	514863
1986-04	96.6	2.3	518621
1986-05	98.9	2.4	530969
1986-06	97.9	3.2	525601
1986-07	90.6	5.2	486409
1986-08	90.2	4.6	484261
1986-09	90.8	3.4	487482
1986-10	93	3.2	499294
1986-11	94	3.9	504662
1986-12	96.7	2.2	519158
1987-01	96.7	2.2	519158
1987-02	98.6	1.5	529359
1987-03	97.7	1.7	524527
1987-04	98.3	2	527748
1987-05	98.5	2.4	528822
1987-06	96.6	7.1	518621
1987-07	84.3	6.1	452586
1987-08	81.6	14.8	438090
1987-09	86.7	11.8	465471
1987-10	93.4	5.1	501441
1987-11	97.7	2.7	524527
1987-12	98	2.9	526138
1988-01	99.4	1.3	533654
1988-02	99.4	1.1	533654
1988-03	99.6	0.8	534728
1988-04	99.8	0.6	535801
1988-05	97.9	4.6	525601
1988-06	94.3	5.2	506273
1988-07	84.1	7.5	451512
1988-08	83.9	18	450438
1988-09	91.5	9.4	491241
1988-10	97.1	2	521306
1988-11	98.6	1.8	529359
1988-12	99.2	1.6	532580
1989-01	99.6	0.9	534728
1989-02	99.2	1.2	532580
1989-03	99.1	1.2	532043
1989-04	99.3	1.2	533117
1989-05	99.3	2.6	533117
1989-06	95.1	2.5	510568
1989-07	92.3	4.2	495536
1989-08	85.4	7	458491
1989-09	73.9	8.2	396751
1989-10	83.2	6	446680
1989-11	91.2	5.1	489630
1989-12	94.1	4.6	505199
1990-01	95.8	4	514326
1990-02	95.2	3.9	511105
1990-03	96.3	3.5	517011
1990-04	96.7	2.8	519158
1990-05	94.5	2.6	507347
1990-06	96.2	2.4	516474
1990-07	87.9	4.8	471913
1990-08	78	20.3	418762
1990-09	77.7	26	417152
1990-10	91.6	6.1	491777
1990-11	97.9	1.4	525601
1990-12	99	1.5	531506
1991-01	99	1.7	531506
1991-02	98.4	1.8	528285
1991-03	98.5	1.5	528822
1991-04	98.1	1.8	526674
1991-05	97.6	3.5	523990
1991-06	93.5	3.8	501978
1991-07	82.7	4.4	443996
1991-08	77.8	14.1	417689
1991-09	67.5	21.1	362391
1991-10	92.5	3.7	496609
1991-11	96.7	2.4	519158
1991-12	95	4.2	510031
1992-01	97.4	2	522916
1992-02	99	1.4	531506
1992-03	98.7	1.6	529896
1992-04	99.2	1.2	532580
1992-05	98.4	2	528285
1992-06	93.2	3.7	500368
1992-07	80.6	6.6	432721
1992-08	74.6	9.9	400509
1992-09	77.6	3.7	416615
1992-10	90.6	5.2	486409
1992-11	96.4	3.2	517548
1992-12	97.7	2.1	524527
1993-01	98	1.8	526138
1993-02	98.9	1.4	530969
1993-03	98.3	1.8	527748
1993-04	97.4	2.8	522916
1993-05	96.3	5.7	517011
1993-06	90.4	7.3	485335
1993-07	80.1	7.2	430037
1993-08	83.3	13.2	447217
1993-09	76.8	10.9	412320
1993-10	89.7	4.4	481577
1993-11	94.5	2.9	507347
1993-12	95	4	510031
1994-01	96	3.6	515400
1994-02	97.8	2.2	525064
1994-03	98.4	2.1	528285
1994-04	99.1	1.5	532043
1994-05	98.6	1.8	529359
1994-06	91.1	3.2	489093
1994-07	80.5	3.7	432184
1994-08	77.4	9.2	415541
1994-09	71.1	11.9	381718
1994-10	86.5	5	464397
1994-11	97.1	2.3	521306
1994-12	98.5	1.7	528822
1995-01	99.1	1.7	532043
1995-02	99.3	1.6	533117
1995-03	99.5	1.2	534191
1995-04	99.2	2.1	532580
1995-05	96.8	3.6	519695
1995-06	92.6	10.8	497146
1995-07	79.5	13.1	426816
1995-08	63.1	28	338768
1995-09	52.9	33.5	284007
1995-10	73.9	21	396751
1995-11	96.8	3.6	519695
1995-12	98.7	1.6	529896
1996-01	99.2	1.2	532580
1996-02	99.2	1	532580
1996-03	98.9	1.2	530969
1996-04	99	2.1	531506
1996-05	97.6	1.9	523990
1996-06	96.4	3.9	517548
1996-07	91.1	4.8	489093
1996-08	87.8	9	471376
1996-09	89.4	5.6	479966
1996-10	95.6	3.2	513252
1996-11	97.2	3.3	521842
1996-12	99.6	1.1	534728
1997-01	99.8	0.8	535801
1997-02	99.8	0.9	535801
1997-03	99.5	1.6	534191
1997-04	99.3	1.9	533117
1997-05	99.2	3.3	532580
1997-06	91.6	10.3	491777
1997-07	78.8	17.5	423058
1997-08	69.5	17.9	373128
1997-09	72.6	16.6	389771
1997-10	85.6	7.6	459565
1997-11	95.9	2.3	514863
1997-12	96.9	2.2	520232
1998-01	97	2.7	520769
1998-02	98.7	1.4	529896
1998-03	98.9	1.5	530969
1998-04	98.9	1.5	530969
1998-05	97.1	3.1	521306
1998-06	94.3	3.1	506273
1998-07	82.6	2.7	443459
1998-08	78.1	8.6	419299
1998-09	72.1	8.2	387087
1998-10	88.8	4.7	476745
1998-11	96.9	2.8	520232
1998-12	96.3	2.7	517011
1999-01	98.1	2.2	526674
1999-02	99.5	1	534191
1999-03	99.7	0.7	535264
1999-04	99.3	1.7	533117
1999-05	98.3	3.9	527748
1999-06	91.8	4.3	492851
1999-07	79	8.3	424131
1999-08	68.8	31.1	369370
1999-09	64.3	32.8	345211
1999-10	86.4	7.8	463860
1999-11	95.8	3.5	514326
1999-12	98.1	2.6	526674
2000-01	98.6	1.8	529359
2000-02	99.1	1.4	532043
2000-03	99	1.9	531506
2000-04	98.6	2.3	529359
2000-05	96.5	3.7	518084
2000-06	89.2	2.8	478892
2000-07	80.9	3.4	434332
2000-08	78.4	11.5	420910
2000-09	71.8	20.3	385476
2000-10	91.2	6.1	489630
2000-11	95.4	3.2	512179
2000-12	98.1	1.8	526674
2001-01	98.7	1.6	529896
2001-02	98.2	1.8	527211
2001-03	98.4	2.1	528285
2001-04	99	1.1	531506
2001-05	98.2	4.1	527211
2001-06	93.7	2.7	503052
2001-07	80.6	4.5	432721
2001-08	77.5	11.3	416078
2001-09	76.9	9.4	412857
2001-10	84.3	6.2	452586
2001-11	93	4.2	499294
2001-12	94.3	4.6	506273
2002-01	96.4	3.5	517548
2002-02	98.7	2.7	529896
2002-03	99	2	531506
2002-04	99.1	1.8	532043
2002-05	99	2.2	531506
2002-06	95.2	4.4	511105
2002-07	90.6	5.4	486409
2002-08	77.7	14.9	417152
2002-09	82.9	15.5	445069
2002-10	91.2	4.7	489630
2002-11	96	3.2	515400
2002-12	97.8	2.4	525064
2003-01	98.5	2.2	528822
2003-02	99.6	1	534728
2003-03	99.5	1	534191
2003-04	99.3	1.5	533117
2003-05	96.6	4.1	518621
2003-06	93.5	4.1	501978
2003-07	79.7	7.3	427889
2003-08	77.9	13.5	418226
2003-09	77.7	16.4	417152
2003-10	88.1	4.4	472987
2003-11	96.6	2.9	518621
2003-12	97.6	1.5	523990
2004-01	98.2	1.6	527211
2004-02	98.9	1.7	530969
2004-03	99.5	1.5	534191
2004-04	98.6	1.9	529359
2004-05	97.5	4.2	523453
2004-06	93.9	4.4	504126
2004-07	87.2	4.5	468155
2004-08	82.4	9.5	442385
2004-09	77.4	11.3	415541
2004-10	89	5	477819
2004-11	97.6	2.3	523990
2004-12	98.7	1.9	529896
2005-01	99.2	1.3	532580
2005-02	97.3	2.3	522379
2005-03	97.5	1.8	523453
2005-04	98.4	2.1	528285
2005-05	96.9	3.5	520232
2005-06	94.7	7.1	508421
2005-07	76.7	15	411783
2005-08	58.8	31.1	315682
2005-09	46.1	33.1	247499
2005-10	80.4	15.8	431648
2005-11	97.9	1.9	525601
2005-12	98.1	2	526674
2006-01	96.3	5.4	517011
2006-02	97.5	1.7	523453
2006-03	98.3	2.4	527748
2006-04	99.8	1	535801
2006-05	97.7	4.1	524527
2006-06	91.8	3.9	492851
2006-07	78.3	7.2	420373
2006-08	71.2	17.8	382255
2006-09	76.5	17.7	410709
2006-10	84.9	11	455807
2006-11	95.5	3	512716
2006-12	97.7	2.2	524527
2007-01	97.9	2.4	525601
2007-02	98	1.8	526138
2007-03	97.9	1.7	525601
2007-04	97	2.9	520769
2007-05	96	5	515400
2007-06	91	11	488556
2007-07	73.9	19	396751
2007-08	52.8	27.7	283470
2007-09	35.7	29.1	191664
2007-10	64	20.5	343600
2007-11	95.9	3.7	514863
2007-12	97.5	3.5	523453
2008-01	99	1.7	531506
2008-02	99.4	1.2	533654
2008-03	99	1.1	531506
2008-04	98.8	2	530432
2008-05	98.3	3.2	527748
2008-06	95.3	3.3	511642
2008-07	88.8	4.5	476745
2008-08	75.2	14.6	403730
2008-09	67	26.2	359706
2008-10	85.9	13.8	461176
2008-11	96	2.1	515400
2008-12	98.5	1.4	528822
2009-01	98.9	1.8	530969
2009-02	99.3	1.2	533117
2009-03	99.5	1.1	534191
2009-04	98.6	1.7	529359
2009-05	98.5	1.6	528822
2009-06	94.4	7.7	506810
2009-07	75	11.7	402656
2009-08	58.4	20.6	313535
2009-09	52.8	28.6	283470
2009-10	54.2	23.9	290986
2009-11	87.9	12	471913
2009-12	95.2	3.1	511105
2010-01	97.4	1.9	522916
2010-02	98.3	2.2	527748
2010-03	98.8	2.1	530432
2010-04	99	1.5	531506
2010-05	95.4	4.6	512179
2010-06	87.2	9	468155
2010-07	74.3	18.3	398898
2010-08	59.8	23.7	321051
2010-09	49.1	25	263606
2010-10	79.7	14	427889
2010-11	96.8	1.9	519695
2010-12	98.9	1.2	530969
2011-01	98.6	1.6	529359
2011-02	98.1	2	526674
2011-03	98.3	2	527748
2011-04	97.9	2.3	525601
2011-05	95.8	4.7	514326
2011-06	91.1	7	489093
2011-07	66.4	20.8	356485
2011-08	39.5	27.8	212066
2011-09	38.9	33	208844
2011-10	58	34.4	311388
2011-11	93.3	6	500904
2011-12	97	2.8	520769
2012-01	97.4	2.2	522916
2012-02	95.8	3.4	514326
2012-03	97.7	2	524527
2012-04	98.4	2.4	528285
2012-05	94.6	5.4	507884
2012-06	88	12.9	472450
2012-07	67.7	17.9	363464
2012-08	40.9	23.4	219582
2012-09	23	22	123481
2012-10	67.4	30.1	361854
2012-11	83.9	21.3	450438
2012-12	96.5	4.2	518084
2013-01	97.8	4.7	525064
2013-02	99.4	1.2	533654
2013-03	98.5	2.4	528822
2013-04	97.1	4.5	521306
2013-05	94.1	11.6	505199
2013-06	86.6	4.8	464934
2013-07	73.4	11.3	394066
2013-08	54.6	24.2	293134
2013-09	35.6	29.9	191128
2013-10	76.2	19	409099
2013-11	95.3	3.3	511642
2013-12	99.1	1.8	532043

## Sheet: Laptev_sea
yyyy-mm	Ice_Conc	Ice_Conc_STD	Sea ice area (km2)
1979-01	96.4	1.8	753728
1979-02	95.8	2.2	749036
1979-03	96.6	2	755291
1979-04	97.6	2	763110
1979-05	97.5	5.2	762328
1979-06	81.2	11.1	634882
1979-07	66.2	20.8	517601
1979-08	46.1	28.3	360444
1979-09	51.2	31.8	400320
1979-10	90.3	5.9	706033
1979-11	95.7	2.6	748254
1979-12	97	2.7	758419
1980-01	96.5	2.5	754509
1980-02	96.2	2.4	752164
1980-03	97.4	2.1	761546
1980-04	97	2.4	758419
1980-05	90.5	17	707597
1980-06	78.1	22.9	610644
1980-07	55.8	24.5	436286
1980-08	31.2	34.8	243945
1980-09	30	34.9	234562
1980-10	78	11.8	609862
1980-11	97.7	1.7	763892
1980-12	96.2	2.5	752164
1981-01	94.2	5.1	736526
1981-02	95.8	3.2	749036
1981-03	96.7	2.6	756073
1981-04	97.2	2.8	759982
1981-05	93.7	5.5	732617
1981-06	75.5	19.6	590316
1981-07	54.7	26.8	427686
1981-08	36.2	33.7	283039
1981-09	35.6	37.1	278348
1981-10	72.5	15.7	566859
1981-11	93.8	3.8	733399
1981-12	97	2.2	758419
1982-01	97.1	2.4	759201
1982-02	96.5	2.8	754509
1982-03	97.6	2.2	763110
1982-04	97.8	2	764674
1982-05	98.1	2.2	767019
1982-06	89.5	12.5	699778
1982-07	66.4	21.3	519165
1982-08	39.2	29.5	306495
1982-09	23.6	26.9	184522
1982-10	69.6	12.5	544185
1982-11	97	2.4	758419
1982-12	96.8	2	756855
1983-01	95.8	2.1	749036
1983-02	95.3	2.3	745127
1983-03	96.7	2.1	756073
1983-04	96.7	1.7	756073
1983-05	94.1	10	735744
1983-06	79	14	617681
1983-07	60.9	22.1	476162
1983-08	22.4	25.2	175140
1983-09	18.9	27.1	147774
1983-10	81.7	11.5	638792
1983-11	96.5	3.2	754509
1983-12	96.6	2.5	755291
1984-01	97.2	2.7	759982
1984-02	95.1	3.1	743563
1984-03	96.1	2.9	751382
1984-04	97	1.4	758419
1984-05	97.8	2.5	764674
1984-06	89.1	11.1	696651
1984-07	66.3	17.8	518383
1984-08	44.7	29.7	349498
1984-09	26.9	24.4	210324
1984-10	84	6.7	656775
1984-11	95.7	2.9	748254
1984-12	96.9	1.9	757637
1985-01	96.4	2	753728
1985-02	96.2	2.4	752164
1985-03	96.3	2	752946
1985-04	96.7	2	756073
1985-05	96.8	7.1	756855
1985-06	79.6	14	622372
1985-07	58.5	20.4	457397
1985-08	36	33.3	281475
1985-09	23.7	31.8	185304
1985-10	68.2	14.5	533239
1985-11	95.7	2.1	748254
1985-12	96.9	1.8	757637
1986-01	97.3	1.2	760764
1986-02	96.1	1.7	751382
1986-03	95.2	2.7	744345
1986-04	96.4	2.7	753728
1986-05	95.8	6.1	749036
1986-06	84.2	11.6	658339
1986-07	72.8	19.8	569205
1986-08	50.6	39.4	395629
1986-09	43.9	38.9	343243
1986-10	82.7	9	646611
1986-11	97.2	2.1	759982
1986-12	98.2	1.5	767801
1987-01	96	2.6	750600
1987-02	96.6	2.4	755291
1987-03	95.9	1.8	749818
1987-04	95.8	3.1	749036
1987-05	96.8	4.7	756855
1987-06	87.8	13.5	686486
1987-07	68.4	16.8	534802
1987-08	35.3	29.4	276002
1987-09	38.6	33.6	301804
1987-10	83.8	9.7	655211
1987-11	97.4	2.8	761546
1987-12	97.3	4.2	760764
1988-01	97.4	3	761546
1988-02	96.7	3	756073
1988-03	97.3	2.5	760764
1988-04	97.3	2.9	760764
1988-05	90.8	16.5	709942
1988-06	70.7	29.4	552786
1988-07	47.8	28.1	373736
1988-08	32.2	34.8	251764
1988-09	38.1	36	297894
1988-10	79.9	19.2	624718
1988-11	97.1	3.8	759201
1988-12	94.1	6.4	735744
1989-01	96.5	4.3	754509
1989-02	96.5	3.9	754509
1989-03	95.7	3.4	748254
1989-04	96.8	2.6	756855
1989-05	93.9	8.4	734181
1989-06	83.8	14.5	655211
1989-07	66.3	22	518383
1989-08	45.8	32.1	358099
1989-09	30.1	27.9	235344
1989-10	83.1	6.3	649738
1989-11	96.1	3.7	751382
1989-12	97.1	3	759201
1990-01	97.8	3.3	764674
1990-02	95.9	4.8	749818
1990-03	94.9	3.4	741999
1990-04	93.9	5.4	734181
1990-05	83.5	14.8	652866
1990-06	61.1	30.3	477726
1990-07	39.4	30.3	308059
1990-08	18.1	29	141519
1990-09	16.9	31.7	132137
1990-10	62.1	18.8	485544
1990-11	96.6	2.9	755291
1990-12	98.1	2.4	767019
1991-01	98.2	2.5	767801
1991-02	97.1	2.5	759201
1991-03	97.2	2.5	759982
1991-04	94.3	4.5	737308
1991-05	90.7	9.4	709161
1991-06	79.8	18.7	623936
1991-07	40.2	25.4	314314
1991-08	18.2	29.4	142301
1991-09	16.7	26.8	130573
1991-10	69.6	18.5	544185
1991-11	95	3.9	742781
1991-12	93.6	6.5	731835
1992-01	97.7	2.4	763892
1992-02	98.5	2.1	770147
1992-03	96.9	3.5	757637
1992-04	96.6	3.5	755291
1992-05	93.8	9.7	733399
1992-06	83.3	14.7	651302
1992-07	56.4	21.5	440978
1992-08	28.8	29.7	225180
1992-09	35.3	30	276002
1992-10	88.8	4.4	694305
1992-11	97	2.9	758419
1992-12	97.6	2.6	763110
1993-01	97	3.3	758419
1993-02	97.3	2.7	760764
1993-03	95.3	3.6	745127
1993-04	94.7	5.2	740436
1993-05	88.1	16	688832
1993-06	73	24.4	570769
1993-07	64.2	22.5	501964
1993-08	48.4	36	378428
1993-09	42.3	38.2	330733
1993-10	82.7	10.4	646611
1993-11	95.6	3.3	747472
1993-12	96.7	3.5	756073
1994-01	97.5	2.3	762328
1994-02	97.3	2.4	760764
1994-03	96.2	4.5	752164
1994-04	97.1	2.2	759201
1994-05	94.3	7	737308
1994-06	79.7	13	623154
1994-07	51.5	22.8	402666
1994-08	30.1	32.8	235344
1994-09	26	31.2	203288
1994-10	59.4	18.8	464434
1994-11	95.9	3.6	749818
1994-12	96.7	5.3	756073
1995-01	98.6	2.1	770929
1995-02	96.7	5.8	756073
1995-03	97.2	3.7	759982
1995-04	97.5	4	762328
1995-05	92.1	7.9	720107
1995-06	66.4	23.2	519165
1995-07	33.1	25.1	258801
1995-08	5.7	15.5	44566.9
1995-09	4.7	14.8	36748.1
1995-10	35	17.5	273656
1995-11	94.6	3.4	739654
1995-12	95.1	4.3	743563
1996-01	97.7	2.7	763892
1996-02	97.3	2.5	760764
1996-03	97.1	3	759201
1996-04	96.2	2	752164
1996-05	94.4	5.5	738090
1996-06	93.2	6	728708
1996-07	75.4	18.8	589534
1996-08	55.8	30.1	436286
1996-09	62.6	28.3	489454
1996-10	89.5	8	699778
1996-11	95.5	4.5	746691
1996-12	98	2.5	766238
1997-01	96.6	3.3	755291
1997-02	98	2.1	766238
1997-03	96.7	3.6	756073
1997-04	92.1	6.2	720107
1997-05	90.8	13.1	709942
1997-06	76.6	23.2	598916
1997-07	53.8	29.6	420649
1997-08	28.3	27.5	221271
1997-09	19.9	25	155593
1997-10	60	18.1	469125
1997-11	96.3	2.8	752946
1997-12	97.8	2.4	764674
1998-01	97	2.7	758419
1998-02	97.1	2.3	759201
1998-03	97.1	2	759201
1998-04	98.4	1.5	769365
1998-05	94.8	4.3	741218
1998-06	77.1	15.7	602826
1998-07	56.8	22.6	444105
1998-08	39.4	33.9	308059
1998-09	30.5	30.9	238472
1998-10	85.3	7.4	666939
1998-11	96.6	2.5	755291
1998-12	96.9	2.8	757637
1999-01	97.5	2.1	762328
1999-02	97.3	2.6	760764
1999-03	98	1.9	766238
1999-04	97.2	2.6	759982
1999-05	93.3	9.6	729489
1999-06	72.8	21.1	569205
1999-07	41.7	24.9	326042
1999-08	14.2	25.9	111026
1999-09	13.4	24.9	104771
1999-10	67.5	12.7	527766
1999-11	96.6	2.5	755291
1999-12	96.7	3.9	756073
2000-01	97	4.1	758419
2000-02	96	5	750600
2000-03	98	2.5	766238
2000-04	94.8	4.6	741218
2000-05	85.7	11.4	670067
2000-06	63.4	27.7	495709
2000-07	46.8	27.5	365918
2000-08	15.4	25.3	120409
2000-09	8.8	21.1	68805
2000-10	66	15.7	516038
2000-11	95.6	3.3	747472
2000-12	97.2	2.9	759982
2001-01	97.2	3.9	759982
2001-02	97	2.4	758419
2001-03	96.9	2.1	757637
2001-04	97.1	2.6	759201
2001-05	95.7	9.2	748254
2001-06	87.1	11.7	681013
2001-07	63.2	22.4	494145
2001-08	37.6	31.8	293985
2001-09	47	30.7	367481
2001-10	77.3	6.9	604389
2001-11	93.3	4.6	729489
2001-12	95.6	3.3	747472
2002-01	98.1	2.8	767019
2002-02	97.6	2.6	763110
2002-03	97.6	2.2	763110
2002-04	97.1	2.8	759201
2002-05	95	7.7	742781
2002-06	76.5	17.7	598134
2002-07	55.3	25.7	432377
2002-08	18.3	25.6	143083
2002-09	21	32.3	164194
2002-10	73.5	11.9	574678
2002-11	94.2	4	736526
2002-12	96.7	2.1	756073
2003-01	97.9	1.9	765456
2003-02	97.1	2.1	759201
2003-03	95.4	3.8	745909
2003-04	96.3	3.3	752946
2003-05	90.7	8.3	709161
2003-06	71.4	23.6	558259
2003-07	39.4	24.1	308059
2003-08	21.6	30.3	168885
2003-09	21.6	31.9	168885
2003-10	60	20.3	469125
2003-11	96.8	2.8	756855
2003-12	96.5	2.9	754509
2004-01	98.7	1.7	771711
2004-02	98.4	1.8	769365
2004-03	98	2.1	766238
2004-04	98.7	1.4	771711
2004-05	97.9	3.5	765456
2004-06	88.1	11.7	688832
2004-07	73.4	19.2	573896
2004-08	51.5	31.6	402666
2004-09	44.4	37.1	347152
2004-10	83	10.5	648956
2004-11	95.6	4.6	747472
2004-12	95.4	4.6	745909
2005-01	96.5	3.6	754509
2005-02	93.4	6.9	730271
2005-03	96.6	3.6	755291
2005-04	94.9	5.1	741999
2005-05	88.8	14.6	694305
2005-06	70.5	28.8	551222
2005-07	41.4	30.6	323696
2005-08	15.1	21.7	118063
2005-09	5.4	12.5	42221.2
2005-10	53.5	17.9	418303
2005-11	95.1	3.1	743563
2005-12	96	4.6	750600
2006-01	96.6	4.9	755291
2006-02	96.2	4	752164
2006-03	97.1	2.3	759201
2006-04	99.2	1	775620
2006-05	94.3	6.4	737308
2006-06	72.1	16.5	563732
2006-07	38.8	23.9	303368
2006-08	10.5	21.3	82096.9
2006-09	16.3	28	127446
2006-10	56.7	18.6	443323
2006-11	95.4	4.2	745909
2006-12	97.2	3	759982
2007-01	97.4	3.1	761546
2007-02	98.6	1.8	770929
2007-03	96.2	4.1	752164
2007-04	85.5	13.1	668503
2007-05	78.9	24.3	616899
2007-06	59.9	35.7	468343
2007-07	37.1	35.6	290076
2007-08	25.9	33.3	202506
2007-09	21.3	27.9	166539
2007-10	48.2	22.1	376864
2007-11	95.4	3.2	745909
2007-12	98.2	2.2	767801
2008-01	96.6	3.8	755291
2008-02	98.6	1.9	770929
2008-03	97.6	2	763110
2008-04	97.4	2.7	761546
2008-05	92.4	8.9	722452
2008-06	83.1	13	649738
2008-07	69.9	19.8	546531
2008-08	36.3	29.4	283821
2008-09	17.1	26.6	133701
2008-10	61.4	16	480071
2008-11	93.4	6.5	730271
2008-12	97.2	3	759982
2009-01	94.4	5.5	738090
2009-02	98.4	2.4	769365
2009-03	98.8	1.8	772492
2009-04	93.5	6	731053
2009-05	93.5	8.4	731053
2009-06	65.9	24.5	515256
2009-07	27.9	23.9	218143
2009-08	10.1	20.3	78969.4
2009-09	10.1	20.6	78969.4
2009-10	31.1	13.3	243163
2009-11	92.6	4.5	724016
2009-12	96.7	3.9	756073
2010-01	95.1	5.2	743563
2010-02	97.9	3.2	765456
2010-03	98	1.9	766238
2010-04	96.7	4.8	756073
2010-05	88.4	11.8	691178
2010-06	67.3	26.4	526202
2010-07	39.8	30.2	311186
2010-08	22.2	30	173576
2010-09	12.7	25.1	99298.1
2010-10	45.5	19.5	355753
2010-11	92.3	5.4	721671
2010-12	96.3	2.7	752946
2011-01	96.3	3.5	752946
2011-02	97.5	2.3	762328
2011-03	93.7	6.7	732617
2011-04	91.9	6.5	718543
2011-05	85.5	10.8	668503
2011-06	56.6	28	442541
2011-07	20.2	25.2	157939
2011-08	6.6	15.7	51603.8
2011-09	3	10.7	23456.2
2011-10	23.5	16	183741
2011-11	91.6	4.1	716198
2011-12	94.2	6.8	736526
2012-01	96.1	4.6	751382
2012-02	95.4	4.2	745909
2012-03	96.9	3.8	757637
2012-04	95.2	4.9	744345
2012-05	83.6	11.3	653648
2012-06	61.1	24.5	477726
2012-07	24.6	24.1	192341
2012-08	7.8	16.1	60986.2
2012-09	1.1	4	8600.62
2012-10	30.2	16.1	236126
2012-11	86.9	6.6	679449
2012-12	95.7	3.5	748254
2013-01	97.4	2.2	761546
2013-02	98.7	1.9	771711
2013-03	98	1.6	766238
2013-04	93.1	5.6	727926
2013-05	79	21.9	617681
2013-06	58	28.2	453488
2013-07	29.3	27.8	229089
2013-08	14.2	22.8	111026
2013-09	3	10	23456.2
2013-10	47.1	20.9	368263
2013-11	92.3	5.9	721671
2013-12	97.4	3	761546

## Sheet: Kara_sea
yyyy-mm	Ice_Conc	Ice_Conc_STD	Sea ice area (km2)
1979-01	96.2	2.4	477994
1979-02	95.1	2.5	472528
1979-03	96.1	2.9	477497
1979-04	97.9	2.1	486441
1979-05	97.1	3.3	482466
1979-06	75.4	12.4	374644
1979-07	55.4	20.7	275269
1979-08	22.8	22.2	113288
1979-09	8.1	16.9	40246.9
1979-10	54.2	24	269306
1979-11	87.7	13.5	435759
1979-12	96.8	2.3	480975
1980-01	96.5	2.2	479484
1980-02	97.5	2.4	484453
1980-03	97.9	2.5	486441
1980-04	97.3	2.2	483459
1980-05	91.5	12.4	454641
1980-06	85.4	16.1	424331
1980-07	68.9	20.3	342347
1980-08	54.9	22	272784
1980-09	47.9	17.7	238003
1980-10	73.6	15.1	365700
1980-11	94.5	3.5	469547
1980-12	95.6	3.5	475012
1981-01	94.7	2.8	470541
1981-02	97	2.5	481969
1981-03	96.6	3.1	479981
1981-04	96.5	2.6	479484
1981-05	96.9	2.8	481472
1981-06	93.3	5.2	463584
1981-07	80	8.4	397500
1981-08	72.5	15.4	360234
1981-09	67	24.4	332906
1981-10	78.2	23.5	388556
1981-11	87.2	13.1	433275
1981-12	96.7	2.7	480478
1982-01	96.9	2.5	481472
1982-02	98.1	2.4	487434
1982-03	98.5	2.3	489422
1982-04	97.8	2.4	485944
1982-05	97.4	2.8	483956
1982-06	89.1	13.1	442716
1982-07	76.6	19.8	380606
1982-08	56.8	28.4	282225
1982-09	37.7	34	187322
1982-10	78.8	13.5	391538
1982-11	95.8	4.8	476006
1982-12	94.7	3.7	470541
1983-01	96	3.2	477000
1983-02	95.2	3.7	473025
1983-03	95.4	4.4	474019
1983-04	96.7	3	480478
1983-05	93.9	6.2	466566
1983-06	90.6	6.4	450169
1983-07	70.9	17.1	352284
1983-08	43.2	23	214650
1983-09	20.5	28.4	101859
1983-10	52.4	29.5	260362
1983-11	88.9	10.6	441722
1983-12	97.3	2.9	483459
1984-01	97.1	6.6	482466
1984-02	94.5	9.1	469547
1984-03	97	2.7	481969
1984-04	97.3	2.8	483459
1984-05	96.6	3.3	479981
1984-06	90.3	8.6	448678
1984-07	63.1	21.8	313528
1984-08	24.4	22.1	121238
1984-09	8	13.7	39750
1984-10	38.7	26.3	192291
1984-11	84.6	15.6	420356
1984-12	95	3.3	472031
1985-01	95.6	2.8	475012
1985-02	96.9	2.8	481472
1985-03	95.3	3.6	473522
1985-04	97	2.6	481969
1985-05	94.3	5.8	468553
1985-06	70.5	23.1	350297
1985-07	49.3	18.3	244959
1985-08	14.2	18.5	70556.2
1985-09	3.1	8	15403.1
1985-10	16.9	16.1	83971.9
1985-11	74.6	25.8	370669
1985-12	92.2	8.5	458119
1986-01	97.3	3.6	483459
1986-02	95.1	2.4	472528
1986-03	95.5	2.4	474516
1986-04	97.3	2.4	483459
1986-05	94.9	2.8	471534
1986-06	92.9	5.5	461597
1986-07	76.7	14.8	381103
1986-08	52	28.4	258375
1986-09	55	30	273281
1986-10	72.9	21.6	362222
1986-11	90.1	11.8	447684
1986-12	96.3	2.6	478491
1987-01	95.5	2.8	474516
1987-02	95.9	2.2	476503
1987-03	96.3	1.7	478491
1987-04	95.9	3.5	476503
1987-05	95.2	4.1	473025
1987-06	85.3	18.9	423834
1987-07	60.3	17.9	299616
1987-08	32.8	23.4	162975
1987-09	16.5	21.4	81984.4
1987-10	64.4	19.7	319988
1987-11	92.9	7.1	461597
1987-12	90.4	7.3	449175
1988-01	98.2	2.6	487931
1988-02	98.2	2.5	487931
1988-03	97.9	2.2	486441
1988-04	98.8	2	490912
1988-05	93.4	5.3	464081
1988-06	79.6	17.5	395512
1988-07	65.1	13.4	323466
1988-08	44.1	26.6	219122
1988-09	42.6	30.8	211669
1988-10	82	11	407438
1988-11	96.2	5.2	477994
1988-12	96.7	3.1	480478
1989-01	97.9	2.8	486441
1989-02	98.2	3.1	487931
1989-03	97.9	3	486441
1989-04	97.5	3.1	484453
1989-05	94.3	4.6	468553
1989-06	95	4	472031
1989-07	88.7	11.3	440728
1989-08	77.6	27	385575
1989-09	61.1	35.3	303591
1989-10	76.2	21	378619
1989-11	94.6	6.3	470044
1989-12	97	3.8	481969
1990-01	98.1	3.9	487434
1990-02	94.5	10.6	469547
1990-03	95.8	3.4	476006
1990-04	92.8	4	461100
1990-05	90.4	4.9	449175
1990-06	92.7	7.5	460603
1990-07	80.1	11	397997
1990-08	50.8	21.9	252412
1990-09	40.5	30.1	201234
1990-10	71.5	20.7	355266
1990-11	97.5	3.5	484453
1990-12	98.2	2.4	487931
1991-01	97	3.9	481969
1991-02	96.4	3	478988
1991-03	97	2	481969
1991-04	94.5	2.3	469547
1991-05	94.6	3.1	470044
1991-06	89.9	5.5	446691
1991-07	77.9	8.6	387066
1991-08	62	16.6	308062
1991-09	25	26.8	124219
1991-10	71.7	19.5	356259
1991-11	96	3.3	477000
1991-12	95	6.1	472031
1992-01	98.1	2.9	487434
1992-02	98.8	1.6	490912
1992-03	97.4	3.5	483956
1992-04	97.4	2.7	483956
1992-05	92.1	9.8	457622
1992-06	89.7	8.7	445697
1992-07	63	17.9	313031
1992-08	46.5	32.7	231047
1992-09	39.2	31.9	194775
1992-10	83.3	9.7	413897
1992-11	95.6	4.5	475012
1992-12	96.5	2.8	479484
1993-01	97.2	3.2	482962
1993-02	96.4	6.3	478988
1993-03	96.4	2.7	478988
1993-04	94.9	3.4	471534
1993-05	90.3	9.1	448678
1993-06	67.4	22.7	334894
1993-07	49.5	27.5	245953
1993-08	33.9	30.7	168441
1993-09	19.2	29	95400
1993-10	65.5	14.8	325453
1993-11	88.7	5.1	440728
1993-12	88	4	437250
1994-01	96.2	4.1	477994
1994-02	98.6	2	489919
1994-03	97.8	2.5	485944
1994-04	96.8	3.6	480975
1994-05	91.4	10.5	454144
1994-06	80.9	10.4	401972
1994-07	54.6	22.4	271294
1994-08	31.7	36	157509
1994-09	18.8	30.3	93412.5
1994-10	34.5	21.1	171422
1994-11	95.2	4.1	473025
1994-12	95.4	4.8	474019
1995-01	96.8	3.6	480975
1995-02	92.2	11.6	458119
1995-03	95.9	6.6	476503
1995-04	84.8	21.4	421350
1995-05	84.9	14.8	421847
1995-06	64.1	21.1	318497
1995-07	28.4	22.8	141112
1995-08	2.8	6.1	13912.5
1995-09	0.5	3.1	2484.38
1995-10	27.7	10.9	137634
1995-11	92.8	6.2	461100
1995-12	95	2.9	472031
1996-01	94.8	4.3	471038
1996-02	96.9	2.5	481472
1996-03	93.9	4.3	466566
1996-04	94.1	4.3	467559
1996-05	95.9	3.5	476503
1996-06	88	8.5	437250
1996-07	78	16.7	387562
1996-08	54.9	24.2	272784
1996-09	50.4	28.3	250425
1996-10	81.2	16.7	403462
1996-11	82.2	22.3	408431
1996-12	93.8	9.4	466069
1997-01	97.1	4.7	482466
1997-02	97	4.3	481969
1997-03	93.3	9.7	463584
1997-04	93.8	4.6	466069
1997-05	84.6	17.7	420356
1997-06	63.7	26.4	316509
1997-07	35	30.4	173906
1997-08	16.8	19.1	83475
1997-09	8.7	16.1	43228.1
1997-10	28	25.5	139125
1997-11	91.1	5.5	452653
1997-12	95.8	2.4	476006
1998-01	96.9	2.9	481472
1998-02	98.8	1.8	490912
1998-03	97.4	2.2	483956
1998-04	95.7	3.7	475509
1998-05	93.5	5.4	464578
1998-06	88.5	10.3	439734
1998-07	69.1	18.9	343341
1998-08	43.8	26.8	217631
1998-09	44.6	29.6	221606
1998-10	88	9.9	437250
1998-11	95.5	3.9	474516
1998-12	95.8	2.3	476006
1999-01	98.3	1.4	488428
1999-02	97	2.1	481969
1999-03	98.7	1.2	490416
1999-04	97.4	2	483956
1999-05	89.2	13.4	443212
1999-06	81.3	13.3	403959
1999-07	68.6	8.4	340856
1999-08	34.9	19.8	173409
1999-09	15.9	13.3	79003.1
1999-10	66.1	15.3	328434
1999-11	88.9	9.5	441722
1999-12	91.1	10.1	452653
2000-01	95	8.2	472031
2000-02	95.4	8.2	474019
2000-03	93.9	11.8	466566
2000-04	95.3	4.1	473522
2000-05	91	7.5	452156
2000-06	77.9	18.9	387066
2000-07	53.7	27.4	266822
2000-08	22.6	27.1	112294
2000-09	9.7	18.8	48196.9
2000-10	41.4	25.9	205706
2000-11	80.1	19.1	397997
2000-12	91.3	15.9	453647
2001-01	89.7	16.4	445697
2001-02	90.8	13.1	451162
2001-03	94.4	6.7	469050
2001-04	97.2	2.3	482962
2001-05	90.4	11.1	449175
2001-06	76.6	15.6	380606
2001-07	42.7	24.6	212166
2001-08	17.9	22.2	88940.6
2001-09	8.1	15.6	40246.9
2001-10	32.6	26.1	161981
2001-11	78.1	21.8	388059
2001-12	81	15	402469
2002-01	96	7.2	477000
2002-02	95.8	5.5	476006
2002-03	96.1	4.6	477497
2002-04	94.8	4.3	471038
2002-05	96.2	3.1	477994
2002-06	85.4	8.1	424331
2002-07	64.5	17.8	320484
2002-08	21	22.2	104344
2002-09	27.6	22.1	137138
2002-10	75.2	13.8	373650
2002-11	94.1	3.7	467559
2002-12	94.8	5.1	471038
2003-01	97.7	2.4	485447
2003-02	98.6	1.6	489919
2003-03	98.3	1.8	488428
2003-04	98	1.9	486938
2003-05	92.1	4.3	457622
2003-06	85.5	5.4	424828
2003-07	85.2	8.6	423338
2003-08	72.2	21.6	358744
2003-09	60	31.2	298125
2003-10	69.4	22.1	344831
2003-11	92.9	6.9	461597
2003-12	96	3.1	477000
2004-01	98.6	2.3	489919
2004-02	95.8	5.8	476006
2004-03	96.6	4.1	479981
2004-04	95.6	4.4	475012
2004-05	87.2	13.2	433275
2004-06	66.8	23.5	331912
2004-07	34.2	28.5	169931
2004-08	20.6	24.2	102356
2004-09	13.8	20.8	68568.8
2004-10	53	18	263344
2004-11	91.6	9.7	455138
2004-12	88.7	16.5	440728
2005-01	91.1	16.4	452653
2005-02	86.8	21.5	431288
2005-03	97.1	3	482466
2005-04	96.9	3.6	481472
2005-05	87.3	8.2	433772
2005-06	75.4	16.5	374644
2005-07	36.9	22.9	183347
2005-08	6.8	12.3	33787.5
2005-09	0.2	1.1	993.75
2005-10	28.1	13	139622
2005-11	86.9	11.9	431784
2005-12	86.9	18.7	431784
2006-01	82	22.7	407438
2006-02	90.3	16.8	448678
2006-03	93.7	8.4	465572
2006-04	94.3	14.3	468553
2006-05	82.9	16.4	411909
2006-06	68.4	22.4	339862
2006-07	34.3	25.9	170428
2006-08	10.3	15.6	51178.1
2006-09	13.4	19.1	66581.2
2006-10	49.1	16.6	243966
2006-11	81.8	20.9	406444
2006-12	86.4	18.4	429300
2007-01	86.5	21.7	429797
2007-02	93.8	14.6	466069
2007-03	87.6	23.6	435262
2007-04	83.9	23.8	416878
2007-05	85.2	15.7	423338
2007-06	63.1	24.1	313528
2007-07	36.2	30.6	179869
2007-08	11.9	15.6	59128.1
2007-09	0.7	3.1	3478.12
2007-10	12.4	15.3	61612.5
2007-11	77	22.6	382594
2007-12	86.2	23.1	428306
2008-01	82	27.6	407438
2008-02	85.4	25.5	424331
2008-03	93.8	16.8	466069
2008-04	91.1	7.8	452653
2008-05	84.7	13.9	420853
2008-06	66.1	24.5	328434
2008-07	41.3	26.2	205209
2008-08	9.7	15.3	48196.9
2008-09	0.7	3.3	3478.12
2008-10	22.5	20.8	111797
2008-11	76.8	20.1	381600
2008-12	88.4	19.2	439238
2009-01	88.6	16.9	440231
2009-02	92.4	16.5	459112
2009-03	93.5	14.1	464578
2009-04	94.6	5	470044
2009-05	91.1	9.8	452653
2009-06	73.2	19.8	363712
2009-07	30.8	24.9	153038
2009-08	7.6	12.8	37762.5
2009-09	0.5	2.4	2484.38
2009-10	3	4.6	14906.2
2009-11	49.7	31.4	246947
2009-12	85.9	17.9	426816
2010-01	84	21	417375
2010-02	88.8	12.7	441225
2010-03	92.4	12.1	459112
2010-04	92.9	8.6	461597
2010-05	80.9	16.2	401972
2010-06	55.7	23	276759
2010-07	20.8	19	103350
2010-08	1.4	4.4	6956.25
2010-09	0.6	3.9	2981.25
2010-10	17.8	16.2	88443.8
2010-11	79.8	21.2	396506
2010-12	94.5	7.3	469547
2011-01	94.5	8.5	469547
2011-02	93.3	7.9	463584
2011-03	90.1	13.3	447684
2011-04	89.3	8	443709
2011-05	79.2	15.7	393525
2011-06	55.1	30.4	273778
2011-07	18.8	22.3	93412.5
2011-08	2.6	6.2	12918.8
2011-09	0.1	1.1	496.875
2011-10	8.8	9.8	43725
2011-11	66	25	327938
2011-12	69.6	32.5	345825
2012-01	79.6	27.6	395512
2012-02	70.9	28.5	352284
2012-03	79.8	26.5	396506
2012-04	82.2	24.1	408431
2012-05	72.8	24.5	361725
2012-06	41.4	29.2	205706
2012-07	9.8	16.5	48693.8
2012-08	0.1	1.1	496.875
2012-09	0	0.3	0
2012-10	1.5	3.7	7453.12
2012-11	27.2	27.7	135150
2012-12	61.5	29.5	305578
2013-01	78.9	24	392034
2013-02	90.2	19	448181
2013-03	95.5	5.4	474516
2013-04	91.8	9.3	456131
2013-05	77.7	14.9	386072
2013-06	61.5	28.3	305578
2013-07	35.8	35.2	177881
2013-08	12.9	22.3	64096.9
2013-09	5	13.5	24843.8
2013-10	26.1	25.1	129684
2013-11	63.5	31.4	315516
2013-12	86.3	25.2	428803

## Sheet: Halogens data
est_yr_halogen	Br, ng/g	I, ng/g	Na, ng/g	nssBr	Brenr
1999.14	0.491498	0.0042395	61.2801	0.123817	1.33675
1999.11	0.549694	0.00411145	65.2084	0.158444	1.40497
1999.07	0.658525	0.00622067	75.6719	0.204494	1.4504
1999.04	0.707817	0.00693728	82.3608	0.213652	1.43235
1999	0.8764	0.00830937	59.263	0.520822	2.46472
1998.94	0.867078	0.0124648	40.2277	0.625712	3.59238
1998.88	0.909077	0.015581	46.3908	0.630732	3.26601
1998.82	0.755677	0.0176025	53.7993	0.432881	2.34104
1998.76	0.971214	0.0206704	90.8166	0.426314	1.78237
1998.7	1.16887	0.0244676	100.819	0.563956	1.93229
1998.64	1.32475	0.0141824	88.8843	0.791444	2.48403
1998.58	1.48857	0.0072288	75.6414	1.03472	3.27988
1998.52	1.58318	0.007131	112.693	0.907022	2.34143
1998.46	1.16534	0.00939158	124.222	0.420008	1.56352
1998.4	1.07498	0.0112441	87.1966	0.5518	2.05471
1998.34	0.780327	0.0123401	62.8741	0.403082	2.06849
1998.28	1.33912	0.0150484	57.1751	0.996069	3.90356
1998.22	2.54984	0.0180926	78.1668	2.08084	5.43675
1998.16	2.32035	0.0214907	101.845	1.70928	3.79719
1998.1	2.2724	0.0256083	111.81	1.60154	3.38729
1998.04	2.5611	0.0270178	48.3761	2.27084	8.82357
1997.98	3.5374	0.0313261	39.6222	3.29967	14.8797
1997.92	4.85238	0.0360772	45.2653	4.58079	17.8664
1997.87	5.8823	0.0326769	67.9245	5.47475	14.4334
1997.81	7.48785	0.0243597	218.989	6.17392	5.6988
1997.75	3.21964	0.0202761	370.545	0.99637	1.44816
1997.7	1.9019	0.0214564	391.416	-0.446596	0.809837
1997.64	1.67358	0.0231518	330.84	-0.31146	0.843096
1997.58	2.72316	0.0252006	350.297	0.621378	1.29564
1997.53	3.98493	0.0306499	370.877	1.75967	1.79077
1997.47	3.59571	0.0298024	272.234	1.96231	2.20136
1997.41	2.79703	0.0235159	137.988	1.9691	3.37835
1997.36	2.48396	0.0241217	113.901	1.80055	3.63468
1997.3	3.16173	0.0265502	145.234	2.29033	3.62832
1997.24	2.59256	0.0296722	169.909	1.57311	2.54309
1997.19	2.82797	0.0359587	195.45	1.65527	2.4115
1997.13	2.89537	0.0413297	256.88	1.35409	1.87855
1997.07	1.98889	0.0444851	204.904	0.759466	1.61774
1997.02	2.19769	0.0473232	220.609	0.874036	1.66032
1996.97	2.23876	0.045004	186.931	1.11717	1.99607
1996.92	1.56097	0.0387599	139.292	0.725218	1.86774
1996.87	1.68631	0.0347925	185.882	0.571018	1.51199
1996.82	1.59281	0.0379791	176.581	0.533324	1.50338
1996.77	1.44277	0.051767	141.396	0.594394	1.70063
1996.72	1.30919	0.0700493	108.518	0.658082	2.01071
1996.67	1.18018	0.0987065	66.1173	0.783476	2.97497
1996.62	1.3852	0.111137	73.7899	0.942461	3.1287
1996.57	2.05468	0.111473	104.633	1.42688	3.27284
1996.52	2.69035	0.113305	136.644	1.87049	3.28146
1996.47	2.53397	0.151063	142.577	1.67851	2.96211
1996.42	2.90023	0.182143	133.733	2.09783	3.61445
1996.37	3.26017	0.2101	135.941	2.44452	3.99704
1996.32	3.93252	0.163987	130.898	3.14713	5.0071
1996.27	2.88607	0.130691	124.568	2.13866	3.86144
1996.22	5.17465	0.164549	230.423	3.79211	3.74286
1996.17	8.35424	0.216608	348.847	6.26116	3.99136
1996.12	11.0442	0.259663	480.214	8.16292	3.83308
1996.07	10.7741	0.262003	556.256	7.43656	3.22816
1996.02	9.08836	0.243309	671.533	5.05916	2.25563
1995.96	4.73732	0.186495	445.483	2.06442	1.77235
1995.88	2.76019	0.110361	262.851	1.18308	1.75016
1995.81	2.56013	0.0591002	239.769	1.12152	1.77958
1995.73	1.87369	0.0608974	168.407	0.863248	1.85433
1995.66	2.16966	0.0667812	171.34	1.14162	2.11048
1995.59	2.68021	0.0736526	222.002	1.3482	2.01215
1995.51	1.63067	0.0771519	166.404	0.632246	1.63324
1995.44	1.83908	0.076261	166.13	0.8423	1.84502
1995.37	2.39254	0.0830722	204.785	1.16383	1.9472
1995.29	4.70446	0.116218	268.065	3.09607	2.92495
1995.22	3.97485	0.143539	184.574	2.86741	3.58921
1995.14	3.57235	0.154849	198.736	2.37993	2.99589
1995.07	7.54072	0.207043	415.462	5.04795	3.02503
1995	6.76079	0.204226	297.392	4.97644	3.78893
1994.94	2.38676	0.102873	113.323	1.70682	3.51026
1994.88	0.825235	0.0344001	39.4317	0.588645	3.48804
1994.82	0.938505	0.021553	39.5765	0.701046	3.95228
1994.76	1.07291	0.0184421	47.4323	0.788316	3.76997
1994.7	1.77044	0.0195088	57.7655	1.42385	5.10812
1994.64	2.53649	0.0177428	63.3478	2.1564	6.67345
1994.59	1.69408	0.0177114	68.7257	1.28173	4.10831
1994.53	1.34246	0.0201628	64.7563	0.953922	3.45516
1994.47	1.32306	0.0254389	63.995	0.93909	3.44574
1994.41	1.90233	0.0318616	74.1067	1.45769	4.27836
1994.35	4.16432	0.0383571	82.27	3.6707	8.43629
1994.29	6.11309	0.0464299	88.346	5.58301	11.5325
1994.23	3.95147	0.0478572	103.659	3.32952	6.35332
1994.17	2.77303	0.0488551	116.861	2.07186	3.95488
1994.11	2.09248	0.0688108	212.522	0.817348	1.64099
1994.05	3.75934	0.0762326	266.397	2.16096	2.35197
1994	2.13469	0.0547822	132.184	1.34159	2.69156
1993.95	1.73775	0.0393114	62.4981	1.36276	4.63414
1993.91	1.60269	0.0418672	45.7331	1.32829	5.84074
1993.86	1.72447	0.0513709	45.569	1.45106	6.30718
1993.82	1.80444	0.0629161	46.061	1.52807	6.52917
1993.77	2.66272	0.0685407	95.9967	2.08674	4.62294
1993.73	3.4544	0.0766242	173.137	2.41558	3.32531
1993.69	3.29587	0.0840594	158.072	2.34744	3.47507
1993.64	1.74945	0.0616833	55.2799	1.41777	5.27452
1993.6	2.0105	0.0501996	50.8088	1.70565	6.59499
1993.55	2.05963	0.0552011	72.6524	1.62372	4.72485
1993.51	2.55355	0.061747	83.5137	2.05247	5.09607
1993.46	3.53554	0.0711717	85.5716	3.02211	6.88612
1993.42	5.0053	0.0906318	146.97	4.12348	5.6761
1993.38	5.27189	0.117626	276.083	3.61539	3.18255
1993.33	4.31826	0.149069	238.944	2.8846	3.01204
1993.29	4.86074	0.213225	244.468	3.39393	3.31382
1993.24	6.77869	0.269052	364.081	4.5942	3.10311
1993.2	4.87598	0.20363	256.819	3.33507	3.16434
1993.15	3.02095	0.0958368	130.891	2.2356	3.84665
1993.11	4.81924	0.0932697	194.206	3.654	4.13585
1993.07	3.90859	0.0896623	296.145	2.13172	2.19971
1993.02	2.14114	0.0696509	467.569	-0.664274	0.763217
1992.96	1.50171	0.0663202	265.52	-0.09141	0.942622
1992.89	1.28442	0.0469692	50.1567	0.98348	4.26802
1992.82	2.08426	0.0325811	28.708	1.91201	12.1003
1992.74	4.81782	0.0360436	32.7835	4.62112	24.4931
1992.67	8.09192	0.0441345	55.4895	7.75898	24.3047
1992.6	9.58094	0.0349904	65.9568	9.1852	24.2101
1992.53	13.5011	0.0365569	71.9007	13.0697	31.2957
1992.45	10.6557	0.0427225	108.219	10.0064	16.4107
1992.38	7.42945	0.0409947	139.599	6.59186	8.86999
1992.31	4.08084	0.0383812	250.485	2.57793	2.71529
1992.23	3.09817	0.0428882	315.49	1.20523	1.6367
1992.16	3.42824	0.0434111	342.627	1.37248	1.66762
1992.09	3.95715	0.0418647	360.721	1.79282	1.82835
1992.02	3.75728	0.0449287	323.741	1.81483	1.9343
1991.95	5.48316	0.041373	281.804	3.79234	3.24289
1991.9	7.01606	0.029311	161.199	6.04887	7.25404
1991.84	5.71844	0.0307253	212.014	4.44636	4.49533
1991.78	4.21159	0.0351749	307.924	2.36405	2.27956
1991.72	4.5756	0.0438003	270.715	2.95131	2.81698
1991.66	6.34669	0.0530966	265.337	4.75467	3.98656
1991.61	5.43553	0.0616253	192.268	4.28192	4.71177
1991.55	5.70942	0.074368	201.98	4.49754	4.71121
1991.49	7.16234	0.095469	274.908	5.51289	4.34226
1991.43	5.74369	0.12491	221.097	4.41711	4.32969
1991.37	2.5024	0.155714	112.189	1.82927	3.71754
1991.32	3.25133	0.167425	190.33	2.10935	2.8471
1991.26	6.38121	0.161681	358.304	4.23139	2.96825
1991.2	9.60095	0.166578	415.899	7.10556	3.84747
1991.14	7.00355	0.196018	421.807	4.47271	2.76728
1991.08	4.38613	0.181735	314.305	2.5003	2.32584
1991.03	2.45858	0.139603	153.025	1.54043	2.67775
1990.97	2.86009	0.141785	162.018	1.88798	2.94215
1990.91	3.58302	0.141414	173.862	2.53985	3.43474
1990.86	2.43356	0.107911	127.083	1.67106	3.19156
1990.8	1.56022	0.0812816	93.5034	0.9992	2.78104
1990.74	2.22918	0.0820566	103.723	1.60684	3.58194
1990.69	2.72844	0.0885674	140.052	1.88813	3.24694
1990.63	2.97822	0.0650829	147.659	2.09227	3.3616
1990.58	3.33463	0.0431772	131.951	2.54292	4.21195
1990.52	2.89344	0.0415093	70.349	2.47135	6.85497
1990.46	2.48611	0.0598692	54.8626	2.15693	7.55253
1990.41	1.25018	0.0645006	50.4802	0.947299	4.12762
1990.35	1.34164	0.0773392	86.6208	0.821915	2.58144
1990.3	1.53802	0.0755265	115.981	0.842134	2.21016
1990.24	1.34108	0.0893104	108.867	0.687878	2.05309
1990.18	1.41203	0.13902	187.722	0.285698	1.25365
1990.13	2.02701	0.186034	305.523	0.193872	1.10576
1990.07	2.19923	0.158671	309.128	0.344462	1.18572
1990.02	1.62901	0.111936	190.68	0.48493	1.42386
1989.96	1.71269	0.0915736	161.972	0.740858	1.76233
1989.91	1.97639	0.0840555	142.763	1.11981	2.30731
1989.86	1.66202	0.0679453	85.8613	1.14685	3.22617
1989.8	0.932682	0.0323742	45.5101	0.659621	3.41566
1989.75	1.19882	0.0747979	33.9781	0.994951	5.88036
1989.7	2.03697	0.0575059	36.2564	1.81943	9.36373
1989.64	3.74997	0.0449271	39.8643	3.51078	15.6781
1989.59	4.65165	0.0416794	29.847	4.47257	25.975
1989.54	4.12549	0.0420787	30.3763	3.94323	22.6355
1989.48	3.2635	0.0514091	47.393	2.97914	11.4767
1989.43	2.86372	0.0589661	44.985	2.59381	10.6099
1989.38	2.70356	0.057312	36.4242	2.48501	12.3707
1989.33	2.75858	0.0663146	53.3758	2.43833	8.6137
1989.27	2.97391	0.0703947	69.079	2.55944	7.17514
1989.22	3.3704	0.0809471	63.1241	2.99166	8.89887
1989.17	3.7231	0.0930555	78.6073	3.25146	7.89388
1989.12	3.67961	0.0967979	105.834	3.04461	5.79462
1989.06	3.18466	0.114728	122.424	2.45012	4.33556
1989.01	3.07865	0.149568	177.47	2.01383	2.89124
1988.92	4.5683	0.183791	175.491	3.51535	4.33859
1988.82	4.7971	0.170404	98.0956	4.20853	8.15038
1988.72	3.98462	0.159264	88.3777	3.45435	7.51438
1988.62	6.25109	0.235372	194.082	5.0866	5.36808
1988.52	6.2052	0.249931	173.312	5.16533	5.96727
1988.42	5.69747	0.203983	128.077	4.92901	7.41412
1988.33	4.96081	0.201509	113.925	4.27726	7.25742
1988.23	7.21599	0.220605	128.923	6.44245	9.32855
1988.13	3.78181	0.172513	62.0884	3.40928	10.1517
1988.03	1.60544	0.0947113	37.1834	1.38234	7.19604
1987.95	2.68284	0.0860183	28.6605	2.51088	15.6013
1987.89	6.43528	0.0890125	33.0026	6.23726	32.4989
1987.82	6.38394	0.065078	25.5447	6.23067	41.6521
1987.76	5.91959	0.0608248	36.2959	5.70181	27.1821
1987.69	2.90158	0.0656611	70.055	2.48125	6.9031
1987.62	2.05251	0.0811377	92.5669	1.49711	3.69554
1987.56	2.17558	0.0738458	62.0331	1.80338	5.84521
1987.49	2.17464	0.0808803	72.6136	1.73896	4.99135
1987.43	2.41043	0.092779	78.7549	1.9379	5.10112
1987.36	2.27378	0.108874	74.7901	1.82504	5.06703
1987.3	2.00031	0.088403	75.7842	1.5456	4.39914
1987.23	1.69312	0.0649241	69.7061	1.27488	4.04823
1987.16	1.34096	0.0710336	55.1673	1.00996	4.05119
1987.1	1.59946	0.0796092	82.0315	1.10727	3.24969
1987.03	1.33599	0.0885425	63.616	0.954294	3.50014
1986.97	1.46742	0.0911661	53.4285	1.14685	4.57752
1986.92	1.88492	0.0942213	54.9271	1.55536	5.71946
1986.86	1.60943	0.0880056	38.7808	1.37675	6.91678
1986.8	1.33652	0.0888893	46.0254	1.06037	4.83979
1986.75	1.31664	0.0930052	44.6984	1.04845	4.90935
1986.69	1.25635	0.120297	43.9134	0.99287	4.76829
1986.64	1.73896	0.138952	50.2591	1.43741	5.76665
1986.58	2.68502	0.157134	78.2158	2.21573	5.72139
1986.52	4.34555	0.124859	210.188	3.08442	3.44576
1986.47	5.40583	0.0785986	293.506	3.64479	3.06969
1986.41	6.80199	0.0694622	334.663	4.79401	3.38748
1986.36	7.06539	0.0835155	440.005	4.42536	2.67625
1986.3	7.32882	0.102335	410.301	4.86701	2.97701
1986.24	6.40842	0.104341	262.411	4.83395	4.07022
1986.19	3.17518	0.109969	147.586	2.28966	3.58568
1986.13	2.56117	0.117175	110.902	1.89576	3.849
1986.07	2.23153	0.123207	104.525	1.60438	3.55821
1986.02	2.55472	0.124086	130.683	1.77062	3.25816
1985.95	2.58639	0.140058	287.728	0.860022	1.49817
1985.89	2.77272	0.16308	546.549	-0.506574	0.845523
1985.82	2.81747	0.198357	619.809	-0.901384	0.757618
1985.76	3.95664	0.221385	528.783	0.783942	1.24709
1985.69	4.91458	0.2489	248.512	3.42351	3.296
1985.62	3.84258	0.252689	94.5137	3.2755	6.77605
1985.55	2.0761	0.254098	28.9271	1.90254	11.9617
1985.49	2.89894	0.302599	84.484	2.39204	5.71891
1985.42	7.02711	0.434011	208.356	5.77697	5.62108
1985.35	12.1402	0.580667	335.621	10.1265	6.02872
1985.29	11.6244	0.511017	278.633	9.9526	6.95323
1985.22	9.45535	0.322971	202.421	8.24082	7.78522
1985.15	6.36661	0.226338	177.679	5.30054	5.97202
1985.09	3.87765	0.185522	128.599	3.10606	5.02551
1985.02	2.31522	0.178611	94.3111	1.74935	4.09146
1984.96	1.86533	0.188182	85.9907	1.34939	3.61537
1984.91	2.14067	0.193007	103.499	1.51968	3.44717
1984.85	2.41364	0.201522	83.5931	1.91208	4.81228
1984.8	2.90356	0.224191	74.0021	2.45955	6.53936
1984.74	2.23977	0.265787	47.4075	1.95532	7.87418
1984.69	2.88257	0.312103	50.0767	2.58211	9.59385
1984.63	2.92358	0.414708	61.521	2.55445	7.92028
1984.58	5.98573	0.595554	167.173	4.98269	5.9676
1984.52	12.311	0.708442	307.68	10.4649	6.66873
1984.47	16.9233	0.731499	363.22	14.744	7.7654
1984.41	8.30536	0.539524	233.73	6.90298	5.92233
1984.36	3.30858	0.313026	101.262	2.70101	5.44558
1984.3	3.49715	0.321085	146.329	2.61918	3.9832
1984.25	6.40502	0.475633	192.435	5.25041	5.54734
1984.19	15.8295	0.706884	389.832	13.4905	6.76766
1984.13	24.8386	0.819895	490.225	21.8972	8.44463
1984.08	15.0961	0.558553	329.871	13.1169	7.62727
1984.03	4.05846	0.15417	94.9683	3.48865	7.12248
1983.96	2.24384	0.0487281	63.4207	1.86332	5.89671
1983.89	1.75544	0.0512074	41.478	1.50657	7.0537
1983.82	1.4133	0.0611697	27.8502	1.2462	8.45775
1983.74	1.41968	0.0683697	23.9194	1.27616	9.89211
1983.67	2.58162	0.100493	48.9632	2.28784	8.78762
1983.6	4.2145	0.138838	86.881	3.69321	8.08481
1983.53	4.13626	0.124728	91.9334	3.58466	7.49865
1983.46	2.4742	0.0760744	52.913	2.15672	7.7933
1983.38	2.84537	0.0761296	61.7693	2.47475	7.67741
1983.31	3.16381	0.0844207	70.6465	2.73993	7.46395
1983.24	2.9635	0.04625	52.6306	2.64772	9.38459
1983.17	3.30479	0.0351754	55.622	2.97106	9.90253
1983.1	2.97504	0.0340366	56.782	2.63435	8.73234
1983.02	3.09185	0.0290547	64.6161	2.70415	7.97492
1982.94	3.64527	0.0290736	71.0933	3.21871	8.54574
1982.86	5.42108	0.0446383	86.972	4.89925	10.3886
1982.78	7.98157	0.0516729	95.2201	7.41025	13.9704
1982.69	9.45378	0.0638067	103.792	8.83103	15.1806
1982.61	9.41632	0.0653033	106.89	8.77498	14.6823
1982.53	9.17086	0.0727742	122.57	8.43544	12.4702
1982.44	10.2761	0.0966949	124.243	9.53064	13.7849
1982.36	10.642	0.101067	131.091	9.85545	13.53
1982.28	10.3025	0.110822	143.805	9.43967	11.9404
1982.19	5.81866	0.102466	147.255	4.93513	6.5857
1982.11	5.04029	0.123899	230.045	3.66002	3.65167
1982.03	4.04457	0.140509	164.166	3.05957	4.10618
1981.94	3.3708	0.165663	86.9716	2.84897	6.45958
1981.86	5.00443	0.189655	90.0169	4.46433	9.26572
1981.78	6.19308	0.21071	92.1939	5.63992	11.1958
1981.7	5.21929	0.170412	83.8268	4.71633	10.3771
1981.62	5.54071	0.135079	69.6898	5.12257	13.2509
1981.54	7.00875	0.148861	96.8466	6.42767	12.0616
1981.46	9.75819	0.165848	110.251	9.09668	14.7515
1981.38	13.3892	0.200628	132.885	12.5919	16.793
1981.3	10.8196	0.201621	110.564	10.1562	16.3097
1981.22	5.69427	0.136297	63.5204	5.31315	14.9408
1981.14	2.82954	0.0754721	55.3585	2.49739	8.51884
1981.06	2.22406	0.0751605	64.4669	1.83726	5.74988
1980.97	3.17808	0.0847551	72.0489	2.74579	7.35167
1980.89	3.82947	0.0916335	79.6348	3.35166	8.01465
1980.81	5.34747	0.0662761	83.2262	4.84811	10.7087
1980.73	6.26843	0.0381461	84.532	5.76124	12.3591
1980.65	5.92605	0.0386331	88.3904	5.39571	11.174
1980.57	3.8248	0.0254671	71.6685	3.39479	8.89466
1980.49	3.95157	0.0232738	77.2593	3.48801	8.52448
1980.41	4.27751	0.0180393	62.643	3.90165	11.3807
1980.33	3.37866	0.022646	52.9993	3.06066	10.6249
1980.24	2.491	0.027994	69.5087	2.07395	5.97287
1980.16	1.61843	0.0254105	51.9499	1.30673	5.19228
1980.08	1.68279	0.0267382	52.736	1.36637	5.31828
1980	1.62348	0.0319882	46.4299	1.3449	5.82771
1979.95	2.00014	0.0414875	45.0727	1.7297	7.39598
1979.89	3.40081	0.0419142	55.8089	3.06596	10.1561
1979.84	3.85937	0.0419562	64.1801	3.47429	10.0222
1979.78	4.43521	0.036877	60.0386	4.07498	12.3121
1979.72	2.83006	0.0358293	31.264	2.64248	15.0869
1979.67	1.72162	0.0392212	19.2441	1.60616	14.9104
1979.62	2.37638	0.0452572	29.059	2.20203	13.6296
1979.56	3.18184	0.027333	18.5995	3.07024	28.5119
1979.5	21.1706	0.0674662	60.2014	20.8094	58.6105
1979.45	23.7038	0.0780993	103.942	23.0801	38.0081
1979.39	17.0715	0.0817845	99.7486	16.473	28.5242
1979.34	12.6837	0.0863329	79.1808	12.2086	26.6978
1979.28	8.50056	0.0915874	115.571	7.80713	12.2588
1979.23	7.09847	0.105232	218.204	5.78925	5.42189
1979.17	5.04825	0.109394	285.34	3.33621	2.94868
1979.12	4.93693	0.115104	235.705	3.5227	3.4909
1979.06	4.0012	0.126872	164.578	3.01373	4.05198
1979.01	3.55975	0.134515	138.346	2.72967	4.28846
1978.95	2.51907	0.141936	121.556	1.78973	3.45392
1978.9	2.03775	0.156588	73.2489	1.59826	4.63659
1978.85	2.41782	0.164094	76.7371	1.9574	5.25131
1978.79	2.66694	0.165044	106.196	2.02976	4.18556
1978.74	2.69419	0.177294	154.001	1.77018	2.91577
1978.69	2.53769	0.194325	139.921	1.69816	3.02277
1978.63	3.68177	0.201238	178.033	2.61357	3.44671
1978.58	4.04275	0.214761	265.169	2.45174	2.54099
1978.53	5.1567	0.251498	347.791	3.06995	2.47117
1978.47	6.00228	0.298662	254.577	4.47482	3.92958
1978.42	6.07011	0.358086	204.644	4.84225	4.94363
1978.37	4.02283	0.41289	173.402	2.98242	3.86657
1978.31	3.98258	0.46827	206.262	2.74501	3.21806
1978.26	4.21315	0.536405	211.786	2.94243	3.31557
1978.2	7.95837	0.689608	357.273	5.81473	3.71255
1978.15	12.4423	0.817888	390.949	10.0966	5.30432
1978.1	8.19877	0.738158	208.124	6.95003	6.56561
1978.05	2.51876	0.666308	119.785	1.80005	3.50456
1977.99	1.95937	0.692588	115.188	1.26824	2.83503
1977.94	1.7191	0.676784	95.096	1.14852	3.01292
1977.89	1.81325	0.70598	85.7026	1.29903	3.52624
1977.84	2.45538	0.709533	117.791	1.74863	3.4742
1977.78	6.51437	0.736154	269.83	4.89539	4.02375
1977.73	8.23974	0.701986	326.71	6.27948	4.20339
1977.68	5.47045	0.556752	192.112	4.31778	4.74589
1977.63	5.48079	0.443663	134.824	4.67185	6.77524
1977.58	3.34955	0.410684	73.3222	2.90962	7.61377
1977.53	3.20198	0.376999	71.0804	2.7755	7.50788
1977.47	5.12455	0.391943	97.5692	4.53913	8.7537
1977.42	11.9029	0.510263	141.834	11.0519	13.9869
1977.37	11.5446	0.455435	146.053	10.6683	13.174
1977.32	4.31028	0.249145	101.077	3.70382	7.10725
1977.27	1.93029	0.127227	67.423	1.52575	4.77159
1977.21	2.37597	0.112094	60.1788	2.0149	6.58031
1977.16	2.2436	0.114232	60.6436	1.87974	6.16608
1977.11	2.25432	0.101064	71.7332	1.82392	5.23774
1977.06	1.93434	0.0791328	66.4472	1.53566	4.85182
1977.01	1.89468	0.081694	105.171	1.26365	3.00254
1976.94	1.57286	0.0666403	99.739	0.974426	2.62829
1976.88	1.02763	0.0573686	27.1411	0.864783	6.31042
1976.82	1.6876	0.0663138	29.1498	1.5127	9.64901
1976.76	2.14157	0.0738917	28.4875	1.97065	12.5293
1976.7	1.47945	0.0896695	26.925	1.3179	9.15785
1976.64	1.76056	0.0871652	20.6118	1.63689	14.2359
1976.58	2.65613	0.0764838	14.6614	2.56816	30.1941
1976.52	6.10839	0.0757462	28.1518	5.93948	36.1634
1976.45	11.6938	0.0821579	66.2741	11.2962	29.4077
1976.39	11.5716	0.0823944	132.894	10.7742	14.5123
1976.33	10.2033	0.0830358	223.115	8.86461	7.62185
1976.27	9.47559	0.088312	203.037	8.25737	7.77821
1976.21	8.46608	0.0957842	195.167	7.29508	7.22977
1976.15	7.49288	0.110255	253.236	5.97346	4.93142
1976.09	7.72962	0.113668	401.114	5.32294	3.21173
1976.03	5.89043	0.124295	421.922	3.3589	2.32682
1975.96	5.16391	0.136376	388.67	2.83189	2.21435
1975.88	4.14845	0.149913	224.317	2.80255	3.08228
1975.8	4.57323	0.15118	164.452	3.58652	4.63482
1975.72	3.5616	0.138661	91.4181	3.01309	6.49324
1975.64	6.37998	0.153282	108.152	5.73107	9.83181
1975.56	9.87558	0.176837	110.851	9.21047	14.8481
1975.48	10.8667	0.185056	124.523	10.1196	14.5444
1975.4	6.61259	0.167037	94.4585	6.04584	11.6675
1975.33	3.06319	0.163437	105.31	2.43133	4.84789
1975.25	2.63203	0.166946	141.757	1.78149	3.09453
1975.17	3.42171	0.162163	268.234	1.81231	2.12607
1975.09	4.29952	0.163293	305.074	2.46908	2.34889
1975.01	6.29706	0.181767	227.301	4.93325	4.61727
1974.93	6.7543	0.194426	283.7	5.0521	3.96798
1974.86	5.73471	0.22418	262.662	4.15874	3.63884
1974.78	4.17287	0.281766	160.511	3.2098	4.3329
1974.7	3.79328	0.33872	125.137	3.04246	5.05217
1974.62	4.77046	0.39569	149.129	3.87569	5.33147
1974.54	7.81683	0.471274	233.198	6.41764	5.58669
1974.47	11.7914	0.548562	307.027	9.94924	6.40085
1974.39	13.4535	0.597106	341.691	11.4034	6.56222
1974.31	13.3989	0.63327	395.752	11.0244	5.6428
1974.23	8.7804	0.469725	254.346	7.25432	5.75358
1974.15	2.85401	0.244481	93.9689	2.2902	5.06198
1974.08	1.99069	0.213634	72.2936	1.55693	4.58936
1974	2.1988	0.24123	77.2244	1.73545	4.74548
1973.93	2.45564	0.247735	84.3436	1.94958	4.85245
1973.86	4.23305	0.276201	96.4406	3.65441	7.31547
1973.79	6.56509	0.34097	99.2861	5.96937	11.0205
1973.71	5.8644	0.272223	87.4644	5.33961	11.1748
1973.64	5.14713	0.215954	85.3088	4.63528	10.0559
1973.57	4.65957	0.202182	77.7636	4.19299	9.98661
1973.5	4.23978	0.190835	65.0309	3.84959	10.8661
1973.43	6.02357	0.201767	74.4028	5.57715	13.4932
1973.36	5.98769	0.180783	100.099	5.3871	9.96961
1973.28	6.12482	0.160387	137.746	5.29834	7.41077
1973.21	4.77238	0.167737	143.045	3.91411	5.56046
1973.14	4.43749	0.175431	119.017	3.72339	6.21408
1973.07	6.15378	0.183863	228.98	4.7799	4.47912
1973	8.84876	0.218041	756.11	4.3121	1.9505
1972.93	12.4453	0.25826	1341.16	4.39834	1.54658
1972.86	11.3886	0.286937	645.628	7.51483	2.93993
1972.78	12.4828	0.332016	244.82	11.0139	8.49794
1972.71	14.2041	0.420347	195.907	13.0287	12.0841
1972.64	13.6585	0.376068	200.673	12.4545	11.3439
1972.57	8.89849	0.296111	247.172	7.41546	6.0002
1972.49	8.74865	0.272784	254.097	7.22407	5.73839
1972.42	7.30797	0.262866	285.799	5.59318	4.26172
1972.35	9.47633	0.346391	425.424	6.92379	3.7125
1972.28	14.797	0.441063	585.056	11.2867	4.21527
1972.21	17.8571	0.506351	702.801	13.6403	4.23475
1972.14	13.7042	0.52743	539.573	10.4668	4.23304
1972.07	17.3897	0.618595	537.93	14.1621	5.38784
1971.99	25.8692	0.771097	883.916	20.5657	4.87776
1971.9	22.4582	0.67254	705.212	18.2269	5.30767
1971.81	15.6516	0.491926	515.376	12.5593	5.06155
1971.71	15.8526	0.413458	407.929	13.405	6.47686
1971.62	18.5427	0.449302	471.473	15.7139	6.55488
1971.53	19.4293	0.495237	422.217	16.896	7.66956
1971.43	29.1469	0.618449	527.015	25.9848	9.21761
1971.34	23.0791	0.71009	600.002	19.4791	6.41084
1971.25	9.16782	0.696421	315.196	7.27664	4.84768
1971.16	6.61064	0.645803	224.349	5.26455	4.91098
1971.07	1.8878	0.447217	63.5299	1.50662	4.95252
1970.98	1.36004	0.255954	52.8768	1.04278	4.28682
1970.91	2.1469	0.148191	85.4563	1.63416	4.18713
1970.85	2.99882	0.136549	99.1446	2.40395	5.04116
1970.78	2.54733	0.135237	82.8401	2.05029	5.12499
1970.71	1.59159	0.134479	55.0565	1.26125	4.81805
1970.65	2.02837	0.166958	67.4189	1.62386	5.01435
1970.58	1.87209	0.207668	111.469	1.20328	2.79912
1970.52	2.7077	0.254183	173.622	1.66597	2.59923
1970.45	3.52741	0.323028	263.121	1.94868	2.23434
1970.38	5.0577	0.389096	332.204	3.06448	2.53745
1970.32	8.63325	0.40995	510.686	5.56913	2.81753
1970.25	9.07735	0.399636	474.424	6.23081	3.1889
1970.19	7.75406	0.29451	317.849	5.84697	4.0659
1970.12	4.09322	0.18656	144.864	3.22404	4.70927
1970.05	3.37723	0.245975	127.993	2.60927	4.39768
1969.98	3.90547	0.341537	129.514	3.12839	5.0258
1969.9	5.2346	0.324052	143.019	4.37649	6.10012
1969.83	5.35474	0.284989	133.867	4.55154	6.66674
1969.75	5.17917	0.246374	132.485	4.38426	6.51542
1969.67	5.20763	0.232739	144.755	4.3391	5.99591
1969.59	6.05135	0.230731	143.247	5.19187	7.04069
1969.51	8.49331	0.257075	183.683	7.39121	7.70649
1969.43	5.9014	0.271053	160.43	4.93882	6.13082
1969.35	7.10183	0.330917	189.813	5.96295	6.23581
1969.27	8.65355	0.376246	194.5	7.48655	7.41521
1969.19	7.92577	0.415907	173.294	6.88601	7.62266
1969.12	8.73978	0.443281	220.721	7.41545	6.59942
1969.04	8.50619	0.4009	249.916	7.00669	5.6727
1968.97	6.82904	0.319827	200.015	5.62895	5.69044
1968.91	5.98863	0.233696	156.075	5.05218	6.39503
1968.86	6.09004	0.199561	144.838	5.22101	7.00788
1968.8	7.75846	0.195856	136.356	6.94032	9.48309
1968.75	9.26767	0.19661	141.198	8.42048	10.9393
1968.69	11.8913	0.198187	158.807	10.9385	12.4798
1968.63	10.0065	0.209669	176.818	8.94559	9.43201
1968.58	7.66396	0.208368	159.116	6.70926	8.02764
1968.52	6.67297	0.217916	150.786	5.76825	7.37576
1968.47	5.63934	0.236351	144.86	4.77018	6.48826
1968.41	5.6954	0.237932	145.711	4.82113	6.51449
1968.35	6.88089	0.234557	149.224	5.98555	7.68519
1968.3	3.11142	0.203447	82.3211	2.61749	6.29936
1968.24	1.85633	0.190802	58.5766	1.50487	5.28177
1968.18	1.66341	0.202911	47.0695	1.38099	5.88991
1968.13	2.09169	0.268873	56.3213	1.75376	6.18975
1968.07	2.3251	0.37377	105.561	1.69173	3.67102
1968.02	2.37826	0.472237	152.927	1.4607	2.59193
1967.95	3.02536	0.422264	158.189	2.07623	3.1875
1967.88	2.72167	0.316433	131.369	1.93346	3.45296
1967.82	2.59318	0.33838	176.738	1.53275	2.44541
1967.75	5.22088	0.45246	334.708	3.21263	2.59972
1967.68	12.2529	0.59404	493.42	9.29238	4.13877
1967.61	22.2275	0.748694	782.603	17.5319	4.73367
1967.54	22.7611	0.76044	807.677	17.915	4.69682
1967.47	5.54186	0.37308	211.555	4.27253	4.36597
1967.4	2.33199	0.239491	115.216	1.64069	3.37336
1967.34	3.30403	0.322152	172.163	2.27105	3.19855
1967.27	5.85234	0.381824	239.959	4.41259	4.06482
1967.2	6.39963	0.306189	186.17	5.28261	5.7292
1967.13	2.95755	0.238586	123.069	2.21914	4.00527
1967.06	3.00431	0.217768	137.932	2.17672	3.63018
1966.99	1.21244	0.105132	47.4888	0.927507	4.25518
1966.91	0.657582	0.0558366	27.2024	0.494368	4.02895
1966.82	0.590099	0.0610059	33.7441	0.387634	2.91458
1966.74	0.777879	0.0745258	37.7268	0.551518	3.43646
1966.65	0.993599	0.0881682	45.4152	0.721108	3.64635
1966.57	1.57392	0.0927978	61.0474	1.20764	4.29699
1966.48	1.78479	0.100536	62.4349	1.41018	4.7644
1966.4	2.15205	0.135373	58.124	1.80331	6.17086
1966.31	2.40581	0.146657	55.3086	2.07396	7.24966
1966.23	2.09171	0.138154	75.1014	1.6411	4.64197
1966.14	2.47157	0.153964	148.137	1.58275	2.78073
1966.06	4.02049	0.172472	244.352	2.55438	2.74228
1965.98	4.47851	0.17716	237.766	3.05191	3.1393
1965.92	3.4491	0.177635	118.268	2.73949	4.86057
1965.85	3.67891	0.194852	103.058	3.06056	5.94958
1965.79	4.21257	0.222142	185.46	3.09981	3.7857
1965.73	6.35715	0.258182	309.466	4.50035	3.42372
1965.66	6.55038	0.274844	272.005	4.91835	4.01364
1965.6	4.99194	0.297477	190.619	3.84823	4.36468
1965.54	7.26658	0.368676	173.01	6.22852	7.00015
1965.47	8.93493	0.436556	147.851	8.04782	10.072
1965.41	5.93514	0.388439	127.048	5.17285	7.78595
1965.35	2.919	0.35193	107.245	2.27553	4.53634
1965.28	3.72629	0.324817	145.399	2.8539	4.27134
1965.22	6.99872	0.323392	198.064	5.81034	5.88927
1965.16	8.11563	0.359487	218.049	6.80734	6.20322
1965.09	7.89217	0.381613	235.361	6.48	5.5887
1965.03	4.98875	0.414524	228.801	3.61594	3.63398
1964.95	8.72784	0.541505	296.302	6.95003	4.90932
1964.87	16.8101	0.895909	716.509	12.511	3.91019
1964.79	10.2929	0.999078	601.208	6.68565	2.85339
1964.7	2.8265	0.972827	294.74	1.05806	1.5983
1964.62	1.98029	0.981478	236.908	0.558842	1.39315
1964.54	3.38472	0.848465	257.407	1.84028	2.19155
1964.45	5.07175	0.573668	336.92	3.05023	2.50888
1964.37	4.57632	0.422766	212.953	3.2986	3.58164
1964.29	5.47792	0.425259	133.879	4.67465	6.81949
1964.2	7.42046	0.477954	154.088	6.49593	8.02621
1964.12	4.94419	0.437194	108.295	4.29442	7.60914
1964.04	1.95879	0.370752	77.9865	1.49087	4.18617
1963.94	1.73005	0.368412	119.516	1.01295	2.41258
1963.84	1.79071	0.3864	126.269	1.0331	2.36362
1963.73	2.24195	0.423209	132.863	1.44477	2.81236
1963.63	3.38232	0.507657	197.544	2.19706	2.85364
1963.53	7.10315	0.603742	350.418	5.00064	3.37842
1963.43	5.68298	0.571174	289.402	3.94657	3.27283
1963.33	4.24497	0.471835	222.735	2.90856	3.1764
1963.22	4.05112	0.423487	200.543	2.84786	3.36679
1963.12	3.55872	0.392857	181.204	2.4715	3.27322
1963.02	3.38165	0.360986	182.881	2.28436	3.08183
1962.88	5.48669	0.374481	231.849	4.0956	3.94415
1962.74	6.14574	0.369167	231.568	4.75633	4.42328
1962.59	6.78926	0.26752	185.549	5.67597	6.09835
1962.45	6.21889	0.197078	154.298	5.2931	6.7174
1962.31	3.19403	0.100938	92.2973	2.64025	5.76765
1962.16	2.3503	0.0912054	96.5971	1.77072	4.05516
1962.02	2.90398	0.128178	99.6783	2.30591	4.85559
1961.88	3.19202	0.192813	117.089	2.48949	4.54358
1961.75	3.8565	0.26242	160.382	2.89421	4.00762
1961.62	7.57813	0.339244	275.418	5.92562	4.58584
1961.49	17.9808	0.367153	513.372	14.9006	5.83748
1961.36	7.26911	0.163192	202.429	6.05454	5.9849
1961.23	0.676281	0.0348181	42.1192	0.423566	2.67606
1961.1	0.817292	0.0450966	52.2791	0.503617	2.60554
1960.97	0.726939	0.053705	44.705	0.458709	2.71013
1960.88	0.957683	0.0639501	44.4026	0.691267	3.5947
1960.78	2.18203	0.0909528	81.3464	1.69395	4.47065
1960.68	3.68542	0.117025	118.664	2.97344	5.17627
1960.59	4.08669	0.111762	119.261	3.37112	5.71113
1960.49	2.62161	0.0849034	79.8805	2.14233	5.46986
1960.39	1.18588	0.0642366	55.5191	0.852765	3.55998
1960.29	0.878579	0.0556594	45.7632	0.604	3.19973
1960.2	1.08875	0.0607803	54.1225	0.764015	3.35273
1960.1	1.79922	0.0713916	102.142	1.18637	2.93581
1960	2.69279	0.0906392	173.655	1.65086	2.58443
1959.91	4.14694	0.112923	244.839	2.67791	2.8229
1959.83	4.73117	0.12809	286.162	3.0142	2.75553
1959.74	6.53863	0.159547	343.472	4.4778	3.17281
1959.65	7.91693	0.18968	331.346	5.92885	3.98221
1959.56	8.10583	0.197345	301.54	6.29659	4.48024
1959.47	7.44029	0.186799	343.413	5.37981	3.61095
1959.38	6.96994	0.161244	325.458	5.01719	3.5693
1959.3	6.26388	0.169588	296.434	4.48528	3.5218
1959.21	4.60744	0.169498	222.859	3.27029	3.44571
1959.12	6.61796	0.176161	294.337	4.85194	3.74738
1959.03	5.51794	0.181188	232.453	4.12322	3.95631
1958.96	4.50442	0.173917	168.802	3.49161	4.44744
1958.89	3.84075	0.165659	155.458	2.908	4.11767
1958.83	2.70968	0.169958	119.188	1.99455	3.78908
1958.76	2.77157	0.17654	105.222	2.14024	4.39004
1958.69	3.08438	0.186007	102.638	2.46855	5.00851
1958.63	4.09453	0.199252	95.336	3.52251	7.15807
1958.56	2.97625	0.234714	80.8461	2.49117	6.13563
1958.5	2.22178	0.251448	111.6	1.55218	3.31807
1958.43	2.22015	0.217614	117.428	1.51558	3.15108
1958.37	0.996615	0.182894	52.3329	0.682618	3.17396
1958.3	1.14445	0.200639	63.903	0.761032	2.98486
1958.24	1.41975	0.192689	75.452	0.967038	3.1361
1958.17	1.27029	0.137187	53.1989	0.951097	3.97969
1958.1	1.65965	0.133694	65.1721	1.26862	4.24428
1958.04	1.96346	0.151423	94.1025	1.39884	3.47752
1957.96	2.11199	0.183988	116.494	1.41303	3.0216
1957.86	2.23656	0.197681	93.1615	1.67759	4.00122
1957.77	3.19641	0.205504	89.4797	2.65953	5.9537
1957.67	3.84301	0.231784	108.223	3.19367	5.91835
1957.57	5.1271	0.351484	210.974	3.86126	4.05034
1957.48	6.10227	0.469608	269.628	4.4845	3.77203
1957.38	7.25312	0.448768	316.296	5.35534	3.82191
1957.28	6.52793	0.415644	257.158	4.98498	4.23082
1957.19	6.59872	0.393588	290.314	4.85684	3.78827
1957.09	4.93591	0.332917	217.34	3.63187	3.78509
1956.99	3.81691	0.296664	216.979	2.51504	2.93186
1956.91	3.62756	0.277	165.97	2.63174	3.64279
1956.83	2.49965	0.248191	101.378	1.89138	4.10946
1956.75	3.13356	0.250412	126.923	2.37202	4.11478
1956.67	4.05031	0.247677	195.957	2.87457	3.4449
1956.59	5.27823	0.236901	252.295	3.76446	3.48681
1956.51	7.19729	0.258341	343.194	5.13813	3.49525
1956.43	7.92858	0.296967	365.174	5.73754	3.61863
1956.35	8.9527	0.324633	487.186	6.02958	3.06272
1956.26	8.6011	0.341415	566.682	5.20101	2.52967
1956.18	5.05674	0.363051	385.656	2.7428	2.18534
1956.1	4.70536	0.380185	340.621	2.66163	2.30234
1956.02	6.79569	0.437962	369.841	4.57664	3.06244
1955.94	12.2805	0.543456	423.537	9.73928	4.83252
1955.86	10.0945	0.575953	344.017	8.0304	4.8905
1955.77	4.79307	0.611988	177.479	3.7282	4.50107
1955.69	1.62386	0.736125	63.0917	1.24531	4.28968
1955.61	2.04106	1.04823	91.968	1.48925	3.69886
1955.52	5.87653	1.62192	289.771	4.1379	3.37999
1955.44	19.0714	2.5417	772.077	14.4389	4.1169
1955.36	49.9729	3.02258	1506.56	40.9335	5.52837
1955.27	69.7478	3.52332	1723.17	59.4088	6.74607
1955.19	80.8768	3.68502	1837.01	69.8547	7.33772
1955.11	47.386	3.12375	1835.08	36.3755	4.30372
1955.02	33.8797	2.67378	1621.53	24.1505	3.48228
1954.95	26.7607	1.98693	1375.54	18.5075	3.24245
1954.88	9.47825	0.879535	665.364	5.48607	2.3742
1954.82	1.0546	0.140056	144.531	0.187414	1.21612
1954.75	0.439011	0.0319046	57.3588	0.0948582	1.27563
1954.68	0.405291	0.0298228	49.7153	0.106999	1.35871
1954.62	0.256948	0.0310861	29.4281	0.0803794	1.45523
1954.55	0.324574	0.0523737	24.7104	0.176312	2.18919
1954.49	0.438516	0.0843767	28.6623	0.266542	2.5499
1954.42	0.466566	0.0852	36.7611	0.245999	2.11531
1954.35	0.435644	0.086413	42.2342	0.182239	1.71916
1954.29	0.41144	0.0872241	32.1347	0.218632	2.13393
1954.22	0.341832	0.0889669	24.473	0.194994	2.32795
1954.15	0.421908	0.128342	29.9384	0.242278	2.34876
1954.09	1.07071	0.208457	73.79	0.62797	2.41837
1954.02	3.32921	0.257778	183.578	2.22774	3.02252
1953.95	5.72799	0.235758	300.74	3.92355	3.17439
1953.87	2.65736	0.170264	176.578	1.59789	2.5082
1953.79	2.75647	0.145906	190.2	1.61527	2.41541
1953.72	3.64313	0.171132	212.106	2.37049	2.86266
1953.64	2.21267	0.147567	140.889	1.36734	2.61751
1953.56	1.9733	0.119834	140.272	1.13167	2.34461
1953.48	2.81967	0.102907	197.316	1.63577	2.38169
1953.41	2.39904	0.101913	154.836	1.47002	2.58235
1953.33	2.94618	0.113999	155.46	2.01342	3.15856
1953.26	2.67489	0.131586	137.562	1.84952	3.24083
1953.18	2.18615	0.189528	140.574	1.34271	2.59193
1953.1	3.89638	0.235413	220.224	2.57504	2.9488
1953.02	5.66584	0.265334	310.048	3.80555	3.04568
1952.96	6.28932	0.323276	342.19	4.23618	3.06327
1952.9	6.79449	0.337642	398.217	4.40519	2.84371
1952.84	6.87651	0.270415	401.458	4.46776	2.85481
1952.79	5.9383	0.247789	358.132	3.78951	2.76355
1952.73	5.84645	0.205295	311.893	3.97509	3.12418
1952.67	4.38717	0.13632	233.135	2.98836	3.13636
1952.61	2.07031	0.0802771	109.581	1.41282	3.14883
1952.55	2.1329	0.0650981	93.8784	1.56963	3.78664
1952.49	2.55881	0.100485	131.713	1.76853	3.23786
1952.43	1.69265	0.101601	95.2494	1.12115	2.96179
1952.38	1.5176	0.0870636	74.0667	1.0732	3.41494
1952.32	1.62362	0.0869837	100.59	1.02008	2.69016
1952.26	2.80144	0.0903999	169.871	1.78221	2.7486
1952.2	4.78124	0.0997425	175.259	3.72969	4.54683
1952.14	6.48359	0.104854	171.942	5.45194	6.28467
1952.09	3.99971	0.103053	124.573	3.25227	5.35123
1952.03	3.57913	0.12011	129.503	2.80211	4.60624
1951.97	3.15966	0.151966	108.397	2.50928	4.85816
1951.9	2.81161	0.134958	96.1675	2.23461	4.87277
1951.84	3.90078	0.0951819	121.966	3.16898	5.33042
1951.78	5.14074	0.0926244	148.912	4.24727	5.75367
1951.71	8.91038	0.121185	205.526	7.67722	7.22567
1951.65	9.0823	0.162953	271.693	7.45214	5.57142
1951.58	7.29985	0.171044	345.295	5.22808	3.52348
1951.52	6.04702	0.168826	447.305	3.36319	2.25313
1951.46	7.37273	0.204472	378.065	5.10434	3.2502
1951.39	4.98813	0.246246	229.915	3.60864	3.61592
1951.33	4.06829	0.950007	199.498	2.8713	3.39877
1951.27	6.76181	2.36484	267.027	5.15965	4.22043
1951.2	15.6265	0.38749	482.202	12.7333	5.40109
1951.14	11.0007	0.251323	380.126	8.71994	4.82327
1951.08	2.74809	0.0805966	143.522	1.88696	3.19125
1951.01	2.90694	0.0916337	141.643	2.05708	3.4205
1950.94	2.12535	0.1006	100.684	1.52125	3.51819
1950.86	1.03303	0.0921	43.1802	0.773949	3.98728
1950.79	0.669075	0.0916145	31.3536	0.480953	3.55661
1950.71	0.477198	0.107193	27.677	0.311136	2.87361
1950.64	0.47068	0.137222	31.9677	0.278874	2.45394
1950.56	0.664414	0.185926	46.403	0.385996	2.38639
1950.49	0.827999	0.233764	52.8039	0.511176	2.61344
1950.41	1.13717	0.276944	67.6962	0.730993	2.79969
1950.34	1.32285	0.310471	93.1475	0.763965	2.36694
1950.26	1.88452	0.348493	149.271	0.988894	2.10414
1950.18	3.1223	0.359685	186.314	2.00442	2.79304
1950.11	4.3984	0.349032	224.808	3.04955	3.26086
1950.03	5.18458	0.354757	244.708	3.71633	3.53113
