# Supplementary material for: Halogen-based reconstruction of Russian Arctic sea ice area from the Akademii Nauk ice core (Severnaya Zemlya)
Source: Copernicus journal article supplement (doi:10.5194/tc-10-245-2016), 2016-01-26
Supplement: Supplementary file [file tc-10-245-2016-supplement-title-page.pdf › tc-10-245-2016-supplement-title-page.pdf]

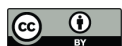

## *Supplement of*

# **Halogen-based reconstruction of Russian Arctic sea ice area from the Akademii Nauk ice core (Severnaya Zemlya)**

**A. Spolaor et al.**

*Correspondence to:* A. Spolaor ([andrea.spolaor@unive.it](mailto:andrea.spolaor@unive.it))

- [tc-10-245-2016-supplement-title-page.pdf](#)
- [Supplementary informations\\_dataset.xlsx](#)
- [\\_\\_MACOSX](#)
  - [.\\_Supplementary informations\\_dataset.xlsx](#)

The copyright of individual parts of the supplement might differ from the CC-BY 3.0 licence.
